# Supplementary material
Source: PubMed Central journal article supplement (PMC2737586)
Supplement: NIHMS112897-supplement-01.pdf [file NIHMS112897-supplement-01.pdf]

## 1 SUPPLEMENTAL DATA

2

3 **Alternative Epimerization Involved in C<sub>7</sub>N-aminocyclitol Biosynthesis is Catalyzed by**4 **ValD, a Large Protein of the Vicinal Oxygen Chelate Superfamily**

5

6 **Hui Xu, Yirong Zhang, Jongtae Yang, Taifo Mahmud, Linqun Bai, and Zixin Deng**

7

8

9 **Table S1. Strains used in this study**

| Strain                         | Relevant genotype/comments                                                                                                    | Source/ref.       |
|--------------------------------|-------------------------------------------------------------------------------------------------------------------------------|-------------------|
| <b><i>Escherichia coli</i></b> |                                                                                                                               |                   |
| DH10B                          | <i>F mcrA Δ(mrr-hsdRMS-mcrBC)φ80lacZΔM15 ΔlacX74 recA1 endA1 araD139 Δ(ara, leu)7697 galU galK λ<sup>-</sup> rspL nupG</i>    | GibcoBRL          |
| ET12567(pUZ8002)               | <i>dam dcm hsdS</i> , pUZ8002                                                                                                 | Paget et al, 1999 |
| BW25113                        | K12 derivative: <i>ΔaraBAD, ΔrhaBAD</i>                                                                                       | Gust et al, 2003  |
| <b><i>S. hygroscopicus</i></b> |                                                                                                                               |                   |
| 5008                           | wild-type producer of validamycin                                                                                             |                   |
| ZYR-4                          | 5008 derivative generated by replacement of 1278-bp DNA fragment internal to <i>valD</i> with 1.4-kb <i>aac(3)IV</i> cassette | This work         |
| ZYR-4/pJTU926                  | ZYR-4 complemented with pJTU926 harboring full-length <i>valD</i>                                                             | This work         |
| ZYR-4/pJTU946                  | ZYR-4 complemented with pJTU946 harboring the recombinant N-terminal half of <i>valD</i>                                      | This work         |
| ZYR-4/pJTU947                  | ZYR-4 complemented with pJTU947 harboring the recombinant C-terminal half of <i>valD</i>                                      | This work         |
| ZYR-4/pJTU3258                 | ZYR-4 complemented with pJTU3258 harboring the H44N mutated <i>valD</i>                                                       | This work         |
| ZYR-4/pJTU3259                 | ZYR-4 complemented with pJTU3259 harboring the E183A mutated <i>valD</i>                                                      | This work         |
| ZYR-4/pJTU3260                 | ZYR-4 complemented with pJTU3260 harboring the H229N mutated <i>valD</i>                                                      | This work         |
| ZYR-4/pJTU3261                 | ZYR-4 complemented with pJTU3261 harboring the E366A mutated <i>valD</i>                                                      | This work         |
| ZYR-4/pJTU3266                 | ZYR-4 complemented with pJTU3266 harboring the H44N and H229N double mutated <i>valD</i>                                      | This work         |
| ZYR-4/pJTU3267                 | ZYR-4 complemented with pJTU3267 harboring the E183A and E366A mutated <i>valD</i>                                            | This work         |

10

11

1 **Table S2. Plasmids used in this study**

| Plasmids       | Relevant genotype/comments                                                            | Source/ref.          |
|----------------|---------------------------------------------------------------------------------------|----------------------|
| pHZ1358        | <i>tsr, bla, oriT, ori</i> (pIJ101)                                                   | Sun et al, 2002      |
| pHZ2239        | pSET152 with the 19kb <i>EcoRI</i> fragment from cosmid 20E1                          | This work            |
| pIJ790         | $\lambda$ -RED( <i>gam, bet, exo</i> ), <i>cat, araC, rep101<sup>ts</sup></i>         | 3                    |
| pIJ773         | <i>aac(3)IV, oriT</i>                                                                 | 3                    |
| pRSET B        | P <sub>T7</sub> RBS 6×His Xpress <sup>TM</sup> Epitope EK, <i>bla</i>                 | Invitrogen           |
| pMD18 T-vector | pUC18 derivative                                                                      | TaKaRa               |
| pPM927         | <i>tsr, oriT, int, attP</i>                                                           | Smokvina et al, 1990 |
| pJTU968        | pRSET BpRSET B derivative <i>bla, PermE*</i>                                          | This work            |
| pValD          | 1.4-kb <i>valD</i> fragment cloned in pRSET BpRSET B                                  | This work            |
| pJTU712        | 7.8-kb <i>BclI</i> fragment from pHZ2239 cloned in BamHI-digested pHZ1358             | This work            |
| pJTU713        | pJTU712 recombinant with 1384-bp <i>aac(3)IV</i> cassette through Redirect Technology | This work            |
| pJTU926        | pPM927 carrying <i>PermE*</i> and <i>valD</i>                                         | This work            |
| pJTU942        | pRSET B carrying the 603-bp N-terminal half of <i>valD</i> (BamHI/EcoRI)              | This work            |
| pJTU943        | pRSET BpRSET B carrying the 723-bp C-terminal half of <i>valD</i> (BamHI/EcoRI)       | This work            |
| pJTU946        | pPM927 carrying <i>PermE*</i> and N-terminal half of <i>valD</i>                      | This work            |
| pJTU947        | pPM927 carrying <i>PermE*</i> and C-terminal half of <i>valD</i>                      | This work            |
| pJTU3250       | pRSET BpRSET B carrying the 1.4-kb H44N mutated <i>valD</i>                           | This work            |
| pJTU3251       | pRSET B carrying the 1.4-kb E183A mutated <i>valD</i>                                 | This work            |
| pJTU3252       | pRSET B carrying the 1.4-kb H229N mutated <i>valD</i>                                 | This work            |
| pJTU3253       | pRSET B carrying the 1.4-kb E366A mutated <i>valD</i>                                 | This work            |
| pJTU3258       | pPM927 carrying <i>PermE*</i> and H44N mutated <i>valD</i>                            | This work            |
| pJTU3259       | pPM927 carrying <i>PermE*</i> and E183A mutated <i>valD</i>                           | This work            |
| pJTU3260       | pPM927 carrying <i>PermE*</i> and H229N mutated <i>valD</i>                           | This work            |
| pJTU3261       | pPM927 carrying <i>PermE*</i> and E366A mutated <i>valD</i>                           | This work            |
| pJTU3262       | pRSET B carrying the H44N/H229N mutated <i>valD</i>                                   | This work            |
| pJTU3263       | pRSET B carrying the E183A/E366A mutated <i>valD</i>                                  | This work            |
| pJTU3266       | pPM927 carrying <i>PermE*</i> and H44N/H229N mutated <i>valD</i>                      | This work            |
| pJTU3267       | pPM927 carrying <i>PermE*</i> and E183A/E366A mutated <i>valD</i>                     | This work            |
| pJTU3289       | pRSET B carrying the 1.4-kb E107A mutated <i>valD</i>                                 | This work            |
| pJTU3290       | pRSET B carrying the 1.4-kb H130N mutated <i>valD</i>                                 | This work            |
| pJTU3291       | pRSET B carrying the 1.4-kb E291A mutated <i>valD</i>                                 | This work            |
| pJTU3292       | pRSET B carrying the 1.4-kb H315N mutated <i>valD</i>                                 | This work            |

2

3

4

1 **Table S3. Primers used in this study**

| Primer     | Sequence (5'-3')                                                |
|------------|-----------------------------------------------------------------|
| ValD-PCR-F | GTGCTCTTCTCCGACCGCCCGAACGCACGTGAAGGAGCC<br>attccgggatccgctcgacc |
| ValD-PCR-R | TCAGCATGGAGTGCGCGGGTGGTGGTGACAGCCGGTATG<br>tgtaggctggagctgcttc  |
| ValD-Det-F | CCATCACCTAGCCTGAG                                               |
| ValD-Det-R | CGCCCTAATCTTCGTC                                                |
| ValD-N-F   | AGGGATCCGCATATGCTCTTCTCCGA<br>BamHI NdeI                        |
| ValD-N-R   | GCGAATTCACTCGTACGGCAACACGT<br>EcoRI                             |
| ValD-C-F   | GGGGATCCACATATGCACGGCCTTC<br>BamHI NdeI                         |
| ValD-C-R   | TAGAATTCAGCATGGAGTGCGCGGGT<br>EcoRI                             |
| H44N-F     | GCCCAACGAGTCGACAACTCTGGCGTTCACCGTG                              |
| H44N-R     | CACGGTGAACGCCAGATTGTCGACTCGTTGGGC                               |
| E107A-F    | CGACACCAACCTCGCCCTGTTTCGCCTACAAG                                |
| E107A-R    | CTTGTAGGCGAACAGGGCAGAGGTTGGTGTTCG                               |
| H130N-F    | CACCGGGCACGTGAATCTCGCGCTGCAC                                    |
| H130N-R    | GTGCAGCGCGAGATTACAGTGCCCGGTG                                    |
| E183A-F    | GACGCGCCCCTCGCACTGCGCTCGGTAC                                    |
| E183A-R    | GTACCGAGCGCAGTGCAGAGGGGCGCGTC                                   |
| H229N-F    | GCTCGGTGTCGACAACCTTCGCCAGGACCG                                  |
| H229N-R    | CGGTCTGGCGAAGTTGTCGACACCGAGC                                    |
| E291A-F    | GACCGATACCATCGCCCTGGCAAGCTACCG                                  |
| E291A-R    | CGGTAGCTTGCCAGGGCGATGGTATCGGTC                                  |
| H315N-F    | GTCGGCGGCAGCAATATCGCCCTGCACG                                    |
| H315N-R    | CGTGCAGGGCGATATTGCTGCCCGCCGAC                                   |
| E366A-F    | CGGCCTCTATGTGGCAGTGGTGCGCATGC                                   |
| E366A-R    | GCATGCGCACCACATGACACATAGAGGCCG                                  |

2

3

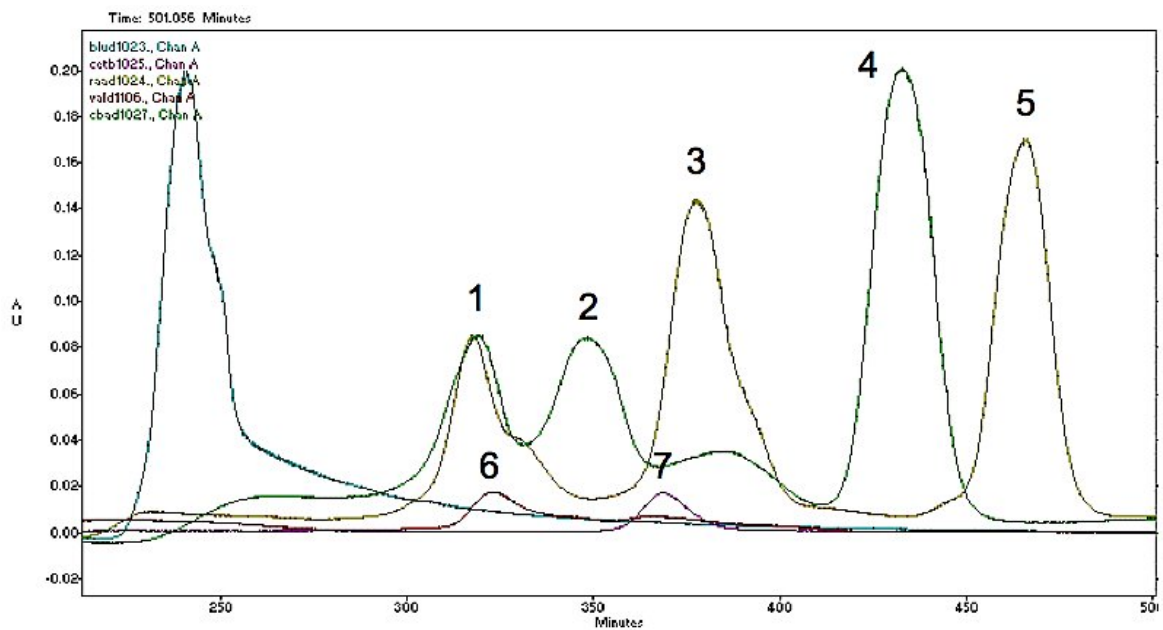

1  
 2 **Figure S1.** High performance gel filtration chromatography of ValD. 1, alcohol dehydrogenase (150 kDa);  
 3 2, BSA (66 kDa); 3, ovalbumin (45 kDa); 4, chymotrypsinogen A (25 kDa); 5, ribonuclease A (13.7 kDa);  
 4 6, ValD (dimer); 7, CetB (dimer).  
 5

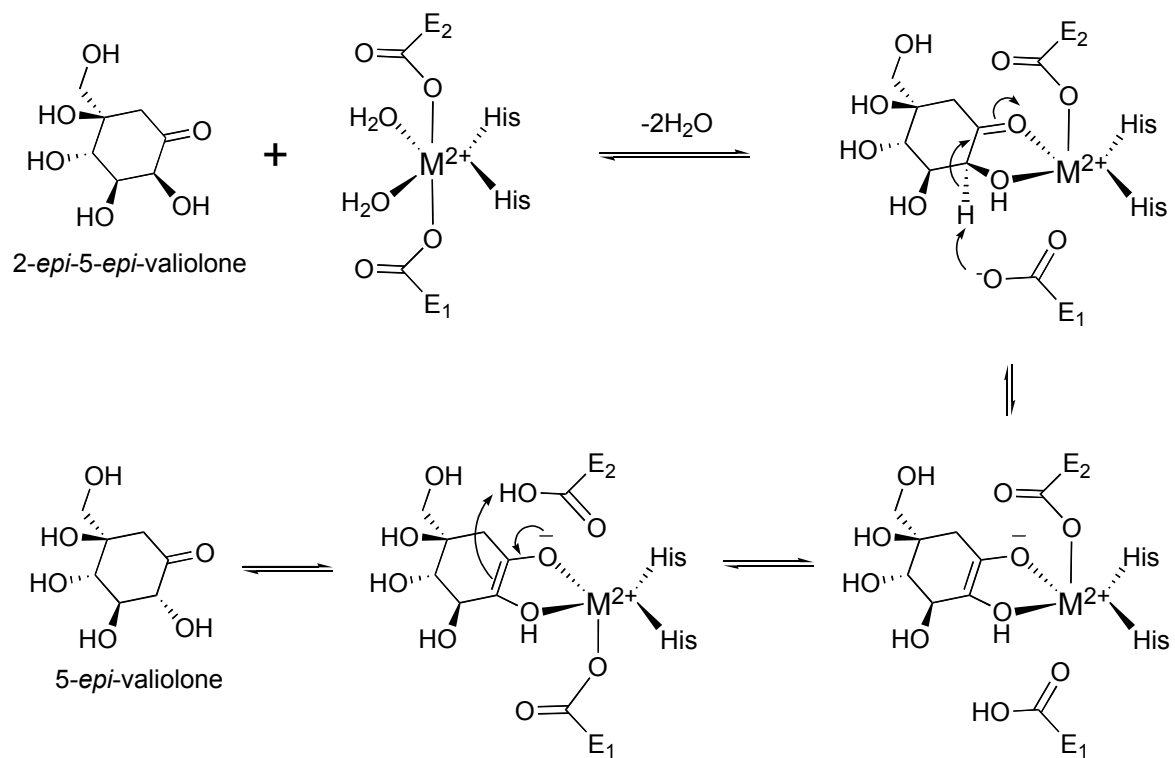

**Figure S2.** Proposed mechanism for the epimerization of 2-*epi*-5-*epi*-valiolone catalyzed by ValD.
